# Supplementary material
Source: PubMed Central journal article supplement (PMC9890233)
Supplement: EMBJ-42-e111304-s003.pdf [file EMBJ-42-e111304-s003.pdf]

**Table of Contents**

Appendix Table S1

Appendix Figures S1-S8 and Figure legends

**Appendix Table S1**

| <b>Reagent, Antibodies and Virus</b>                                              | <b>SOURCE</b>          | <b>IDENTIFIER</b> |
|-----------------------------------------------------------------------------------|------------------------|-------------------|
| Tetrodotoxin (TTX)                                                                | Sigma-Aldrich          | Cat# 4368-28-9    |
| DL-APV                                                                            | Tocris                 | Cat# 0105         |
| CNQX disodium salt hydrate                                                        | Tocris                 | Cat# 1045         |
| SR-95531 (gabazine)                                                               | Tocris                 | Cat# 1262         |
| Adensine 5'-triphosphate magnesium salt                                           | Sigma-Aldrich          | Cat# A9187        |
| Guanosine 5'-triphosphate sodium salt                                             | Sigma-Aldrich          | Cat# G8877        |
| Lidocaine N-ethyl Bromide (QX-314)                                                | Sigma-Aldrich          | Cat# L5783        |
| Phosphocreatine disodium salt hydrate                                             | Sigma-Aldrich          | Cat# P7936        |
| Carbachol chloride                                                                | Abmole                 | Cat# 51-83-2      |
| Noradrenaline bitartrate                                                          | Abmole                 | Cat# 108341-18-0  |
| Atropine sulfate                                                                  | Abmole                 | Cat# 55-48-1      |
| Mecamylamine hydrochloride (MEC)                                                  | Abmole                 | Cat# 826-39-1     |
| Pirenzepine dihydrochloride                                                       | Abmole                 | Cat# 29868-97-1   |
| 4-DAMP                                                                            | Sigma-Aldrich          | Cat# 1952-15-4    |
| Retigabine                                                                        | Absin                  | Cat# 150812-12-7  |
| XE991 dihydrochloride                                                             | Tocris                 | Cat# 122955-13-9  |
| Goat-serum                                                                        | Thermo Fisher          | Cat# 16210064     |
| GAD 65                                                                            | Abcam                  | Cat# Ab26113      |
| GFP                                                                               | Abcam                  | Cat# Ab13970      |
| Alex Fluor 488                                                                    | Thermo Fisher          | Cat# A-11039      |
| Alex Fluor 488                                                                    | Abcam                  | Cat# 150113       |
| Gold antifade reagent                                                             | ProLong                | Cat# 2260877      |
| AAV2/9- hSyn-GCaMP6s                                                              | Taitool                | Cat# S0528-9-H50  |
| AAV2/9-hSyn-hChR2(H134R)-mCherry                                                  | Taitool                | Cat# S0312-9-H50  |
| AAV2/9-hSyn-mCherry-WPRE                                                          | Taitool                | Cat# S0238-9-H20  |
| Corticosterone ELISA Kit                                                          | Enzo life sciences     | Cat# ADI-900-097  |
| <b>Experimental Models: Strains</b>                                               |                        |                   |
| Ai32 mouse: <i>B6.129S-Gt(ROSA)26Sor<sup>tm32(CAG-COP4*H134R/EYFP)Hze</sup>/J</i> | The Jackson Laboratory | RRID:012569       |
| Ai9 mouse: <i>B6.Cg-Gt(ROSA)26Sor<sup>tm9(CAG-tdTomato)Hze</sup>/J</i>            | The Jackson Laboratory | RRID:007909       |
| PV-cre mouse: <i>B6.129P2-Pvalb<sup>tm1(cre)Arbr</sup>/J</i>                      | The Jackson Laboratory | RRID:008069       |
| <b>Software and Algorithms</b>                                                    |                        |                   |
| Prism                                                                             | GraphPad               | RRID:002798       |
| Mini Analysis                                                                     | Synaptosoft            | RRID:002184       |

|               |           |                     |
|---------------|-----------|---------------------|
| MATLAB R2016a | MathWorks | RRID:001622         |
| BioRender     | BioRender | RRID:<br>SCR_018361 |

## Appendix Figures and Figure Legends

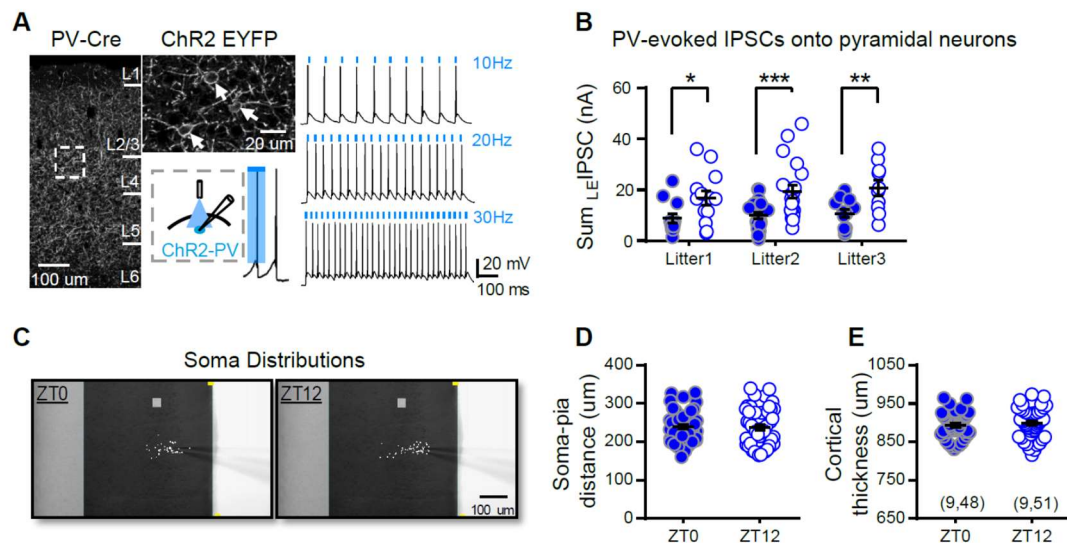

**Appendix Figure S1. The strengthened output from PV neurons by the end of the light cycle was neither due to the difference in ChR2 expression nor the spatial distribution of the recorded neurons.**

A. Brief blue light reliably activated ChR2-expressed PV neurons (white arrows) in V1. B. Comparison of the sum<sub>LE</sub>IPSC amplitude between ZT0 and ZT12. Mice from the same litter were randomly recorded at either time points and the results were compared within litter (Mann-Whitney U test, Litter 1: ZT0:  $9.02 \pm 1.83$  nC; ZT12:  $16.97 \pm 2.91$  nC; Litter 2: ZT0:  $10.07 \pm 1.68$  nC; ZT12:  $19.47 \pm 3.24$  nC; Litter 3: ZT0:  $10.82 \pm 1.66$  nC; ZT12:  $20.82 \pm 2.79$  nC; \* $P < 0.05$ ; \*\* $P < 0.01$ ; \*\*\* $P < 0.001$ ). C. The locations of all recorded pyramidal neurons were mapped on the reference image. D. The soma to pia distance of all recorded pyramidal neurons did not differ between ZT0 and ZT12 (ZT0:  $239.7 \pm 5.72$   $\mu\text{m}$ ; ZT12:  $237.6 \pm 6.91$   $\mu\text{m}$ ; Mann-Whitney U test,  $P = 0.67$ ). E. The cortical thickness between brain slices used in ZT0 and ZT12 did not differ (ZT0:  $892.8 \pm 4.64$   $\mu\text{m}$ ; ZT12:  $898.4 \pm 5.23$   $\mu\text{m}$ ; Mann-Whitney U test,  $P = 0.41$ ). Sample size indicated as (mice, cells).

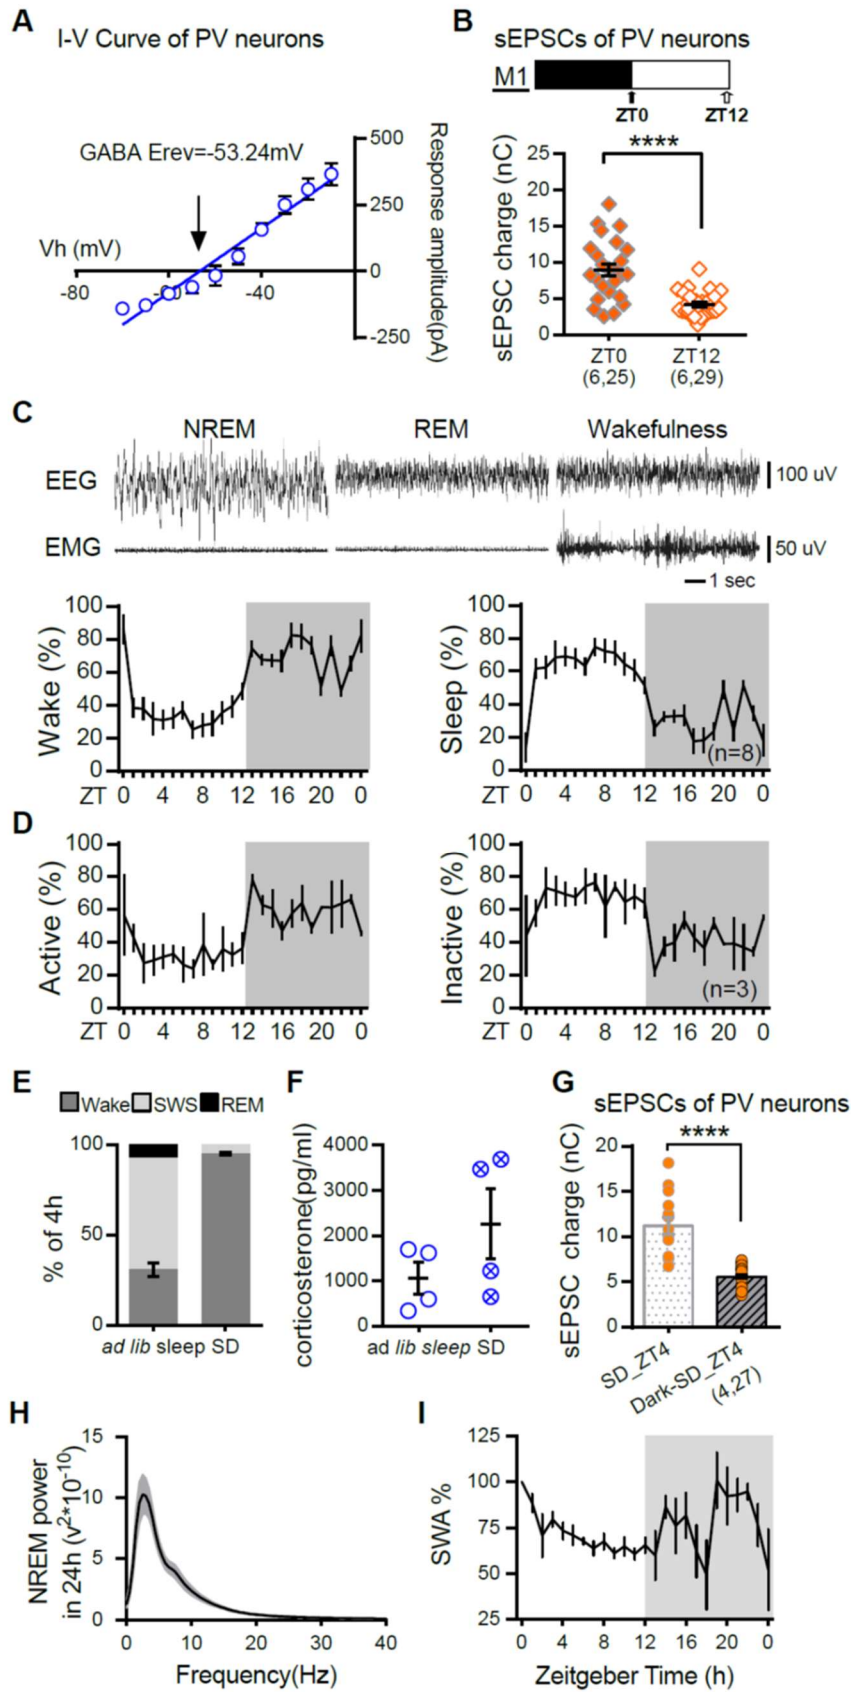

**Appendix Figure S2. Experience- and sleep-dependent regulation of synaptic transmission of PV neurons.**

A. I-V curve obtained with 100  $\mu$ M APV and 20  $\mu$ M CNQX in the bath. Reversal potential for GABA receptor was calculated when I is 0.  $E_{rev} = -53.24 \pm 0.65$  mV,  $n = 13$  cells. Linear fit  $R^2 = 0.96$ . B. PV neurons in L2/3 of the primary motor cortex had higher sEPSCs at ZT0 than ZT12 (ZT0:  $8.99 \pm 0.82$  nC; ZT12:  $4.18 \pm 0.30$  nC; Mann-Whitney U test,  $P < 0.0001$ ). C. Top: Examples of EEG and EMG signal recorded during NREM, REM sleep and wakefulness. The 24-hour sleep (bottom right panel) and wake (bottom left panel) patterns of PV: Ai9 mice monitored by chronic EEG and EMG recordings. D. The 24-hour activity patterns of PV: Ai9 mice monitored by video. E. EEG and EMG recordings confirmed the efficacy of 4-hour sleep deprivation between ZT0 and ZT4. *Ad lib* sleep group:  $n = 4$ ; SD group:  $n = 4$  mice. F. **4 hours of sleep deprivation caused variable but not significant changes in plasma corticosterone level** (Sleep:  $1066 \pm 348$  pg/ml; SD:  $2261 \pm 773$  pg/ml; Mann-Whitney U test,  $P = 0.34$ ). G. Sleep deprivation in complete darkness from ZT0 to 4 prevents the increase in sEPSCs induced by SD alone (SD\_ZT4 as reported in Fig 3H; Dark-SD\_ZT4:  $5.57 \pm 0.21$  nC; Mann-Whitney U test,  $P < 0.0001$ ). H. **The total NREM power spectrum during the 24-hour day.** I. **Temporal profile of NREM • power during the light/dark cycle.**

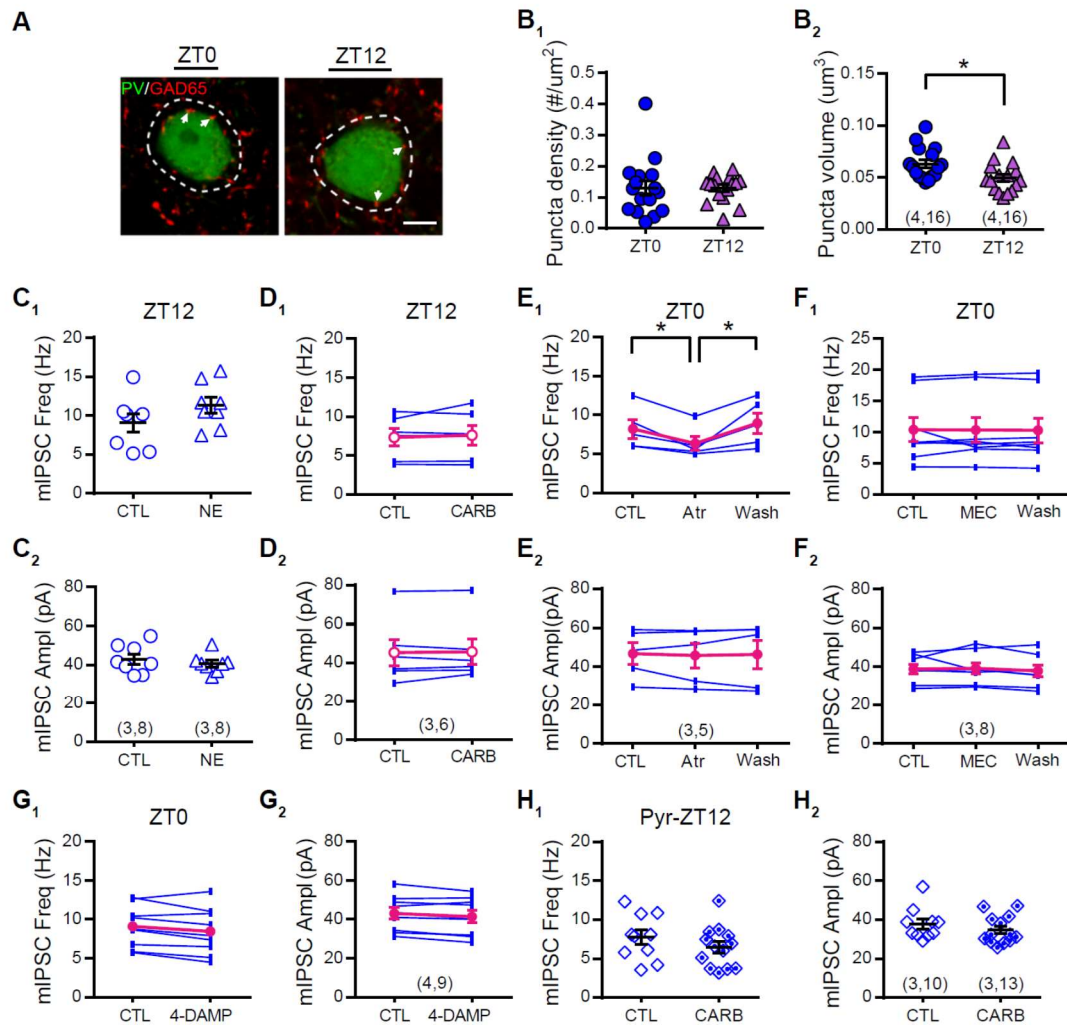

### Appendix Figure S3. ACh via M1R specifically regulates mIPSCs of PV neurons.

A. Representative images showing GAD65 staining in PV: Ai9 mice scarified at ZT0 and ZT12 (green: PV neuron; red: GAD65; scale: 10  $\mu\text{m}$ ). B<sub>1,2</sub>, Somatic GAD65-IR puncta density (B<sub>1</sub>; ZT0:  $0.13 \pm 0.02$ ; ZT12:  $0.12 \pm 0.01$ ; Mann-Whitney U test,  $P = 0.58$ ) and puncta size (B<sub>2</sub>; ZT0:  $0.063 \pm 0.003$ ; ZT12:  $0.049 \pm 0.003$ ; Mann-Whitney U test,  $P = 0.020$ ) around PV neurons. C<sub>1,2</sub>, Incubation with norepinephrine (NE) was effectless on mIPSC frequency (C<sub>1</sub>, CTL:  $9.07 \pm 1.16$  Hz; NE:  $11.31 \pm 1.01$  Hz; Mann-Whitney U test,  $P = 0.1044$ ) and amplitude (C<sub>2</sub>, CTL:  $43.03 \pm 2.61$  pA; NE:  $40.68 \pm 1.69$  pA; Mann-Whitney U test,  $P = 0.7023$ ) at ZT12. D<sub>1,2</sub>, Acute infusion with carbachol (CARB) at ZT12 had no effect on mIPSC frequency (D<sub>1</sub>, CTL:  $7.34 \pm 1.13$  Hz; CARB:  $7.59 \pm 1.28$  Hz; Wilcoxon signed-rank test,  $P = 0.78$ ) and amplitude (D<sub>2</sub>, CTL:  $45.28 \pm 6.85$  pA; CARB:  $45.71 \pm 6.58$  pA; Wilcoxon signed-rank test,  $P = 0.99$ ). E<sub>1,2</sub>, Atropine (Atr) effect on the mIPSC frequency at ZT0 could be reversed by washing out the drug (E<sub>1</sub>, CTL:  $8.22 \pm 1.20$  Hz; Atr:  $6.37 \pm 0.88$  Hz; Wash:  $8.96 \pm 1.32$  Hz; One-way repeated measures ANOVA,  $F(1, 4) = 8.384$ ,  $P = 0.035$ ). No change in mIPSC amplitude was detected (E<sub>2</sub>, CTL:  $46.75 \pm 5.56$  pA; Atr:  $45.78 \pm 6.40$  pA; Wash:  $46.24 \pm 7.35$  pA; One-way repeated measures ANOVA,  $F(2, 8) = 0.1056$ ,  $P = 0.90$ ). F<sub>1,2</sub>, Washing on and out nAChR antagonist *mecamylamine* (MEC)

caused no change in mIPSCs of PV neurons at ZT0 ( $F_1$ , frequency, CTL:  $10.41 \pm 1.89$  Hz; MEC:  $10.37 \pm 1.96$  Hz; Wash:  $10.30 \pm 1.96$  Hz; One-way repeated measures ANOVA,  $F(2, 14) = 0.041$ ,  $P = 0.95$ ;  $F_2$ , amplitude, CTL:  $38.90 \pm 2.45$  pA; MEC:  $39.28 \pm 2.81$  pA; Wash:  $37.87 \pm 2.82$  pA; One-way repeated measures ANOVA,  $F(2, 14) = 0.66$ ,  $P = 0.52$ ).  $G_{1-2}$ . Infusion of M3R antagonist 4-DAMP had no significant effect on mIPSCs at ZT0 ( $G_1$ , frequency; CTL:  $9.09 \pm 0.88$  Hz; 4-DAMP:  $8.45 \pm 0.99$  Hz; Wilcoxon signed-rank test,  $P = 0.09$ ;  $G_2$ , amplitude; CTL:  $43.07 \pm 3.01$  pA; 4-DAMP:  $41.44 \pm 3.17$  pA; Wilcoxon signed-rank test,  $P = 0.054$ ).  $H_{1-2}$ . Incubation with carbachol at ZT12 did not affect the mIPSCs of pyramidal neurons in V1 L2/3 ( $H_1$ , frequency; CTL:  $7.76 \pm 0.92$  Hz; CARB:  $6.45 \pm 0.73$  Hz; Mann-Whitney U test,  $P = 0.34$ ;  $H_2$ , amplitude; CTL:  $37.76 \pm 2.59$  pA; CARB:  $34.73 \pm 2.00$  pA; Mann-Whitney U test,  $P = 0.31$ ). Sample size is indicated as (mice, cells).



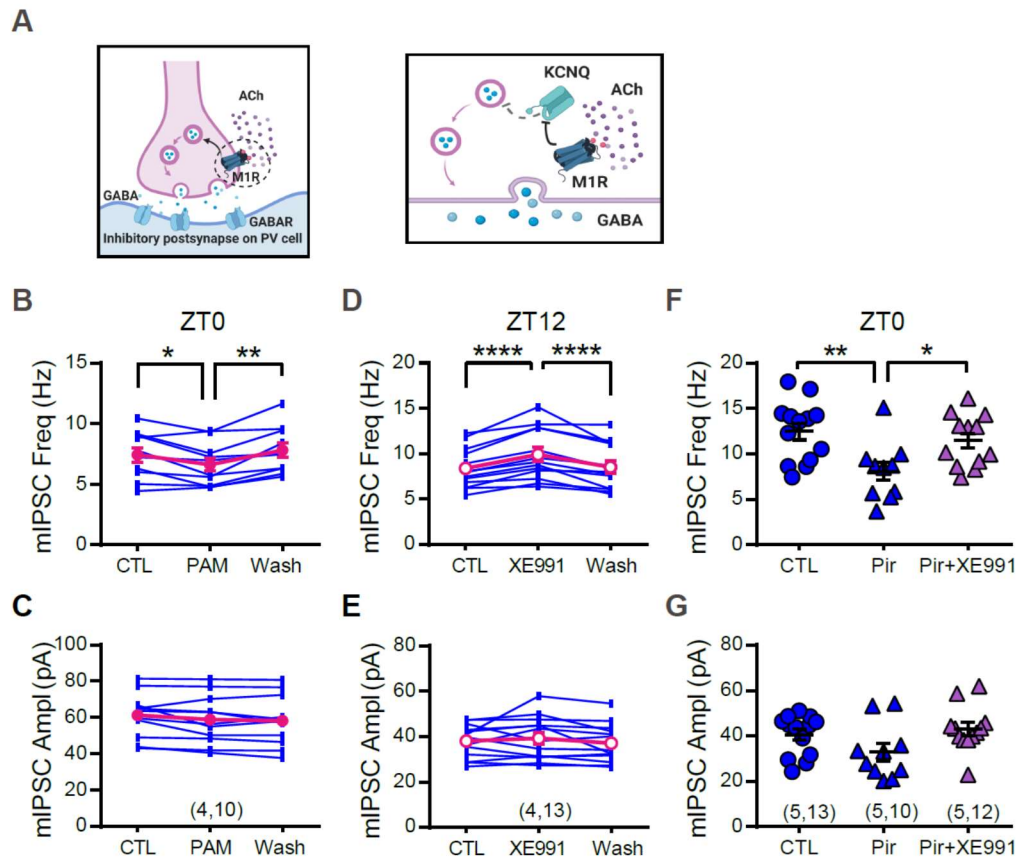

### Appendix Figure S4. KCNQ channel is required for the M1R-dependent regulation of inhibitory synaptic transmission of PV neurons.

A. Diagram showing the potential regulatory mechanism of PV's inhibitory synaptic transmission utilizing KCNQ channels and M1R. B-C. The wash-on and wash-off effect of the KCNQ channels allosteric modulator retigabine (PAM) on PV's mIPSC frequency (B, CTL:  $7.43 \pm 0.62$  Hz; PAM:  $6.63 \pm 0.56$  Hz; Wash:  $7.82 \pm 0.62$  Hz; One-way repeated measures ANOVA,  $F(2, 18) = 6.75$ ,  $P = 0.007$ ) and amplitude (C, CTL:  $59.48 \pm 6.27$  pA; PAM:  $57.88 \pm 5.58$  pA; Wash:  $59.70 \pm 6.60$  pA; One-way repeated measures ANOVA,  $F(2, 20) = 3.19$ ,  $P = 0.06$ ) at ZT0. D-E. The wash-on and wash-off effect of the KCNQ channels blocker XE991 on PV's mIPSC frequency (D, CTL:  $8.39 \pm 0.60$  Hz; XE991:  $9.90 \pm 0.77$  Hz; Wash:  $8.52 \pm 0.68$  Hz; One-way repeated measures ANOVA,  $F(2, 24) = 18.62$ ,  $P < 0.0001$ ) and amplitude (E, CTL:  $38.01 \pm 2.0$  pA; XE991:  $39.25 \pm 2.63$  pA; Wash:  $37.25 \pm 2.34$  pA; One-way repeated measures ANOVA,  $F(2, 24) = 1.11$ ,  $P = 0.34$ ) at ZT12. F-G. mIPSCs recordings in the presence of pirenzepine (Pir) alone or together with XE991. (F, frequency, CTL:  $12.47 \pm 0.93$  Hz; PIR:  $8.08 \pm 1.02$  Hz; PIR+XE991:  $11.47 \pm 0.83$  Hz; One-way ANOVA,  $F(2, 32) = 5.795$ ,  $P = 0.0071$ ; G, amplitude, CTL:  $40.49 \pm 2.50$  pA; PIR:  $32.83 \pm 3.86$  pA; PIR+XE991:  $43.13 \pm 2.87$  pA; One-way ANOVA,  $F(2, 32) = 2.877$ ,  $P = 0.071$ ). Datasets were presented as mean  $\pm$  SEM. Sample size is indicated as (mice, cells).

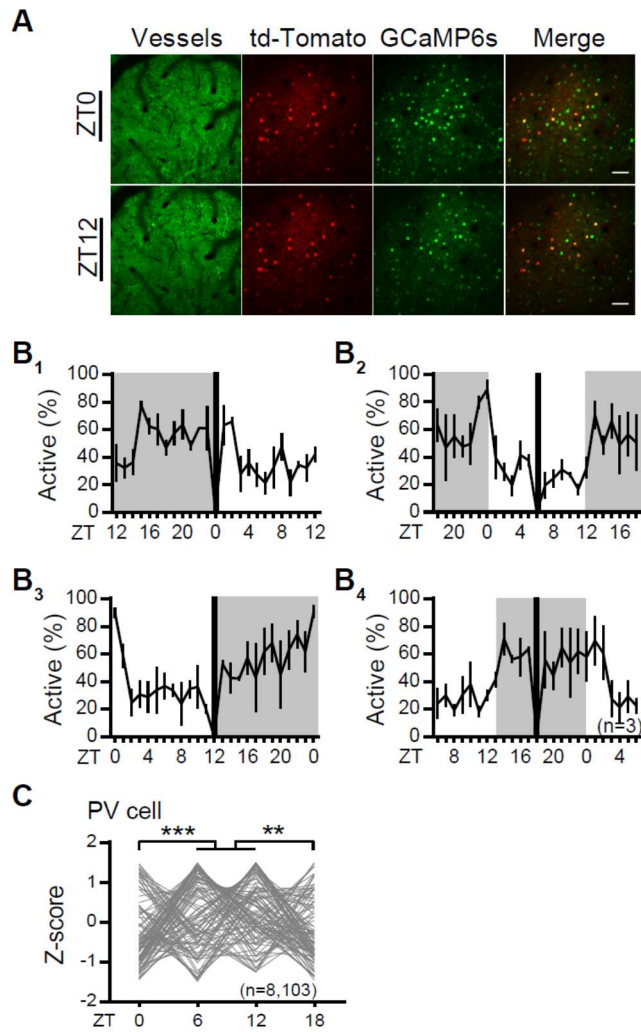

**Appendix Figure S5. Daily oscillation in PV's spontaneous activity correlates with mice's sleep/wake cycle.**

A. Same population of PV neurons were repetitively imaged at different times of the day by using vascular features, td-Tomato and GCaMP6s signals as markers. Scale bar: 100  $\mu$ m. B<sub>1-4</sub>. Pre- and post- 12h arousal states of mice imaged at ZT0, ZT6, ZT12 and ZT18. Regular activity cycles were maintained. C. Activity of individual PV neurons imaged repetitively at four time points (ZT0:  $-0.26 \pm 0.08$ ; ZT6:  $0.21 \pm 0.09$ ; ZT12:  $0.26 \pm 0.07$ ; ZT18:  $-0.21 \pm 0.07$ ; One-way repeated measures ANOVA,  $F(3, 300) = 8.586$ ,  $P < 0.0001$ ).

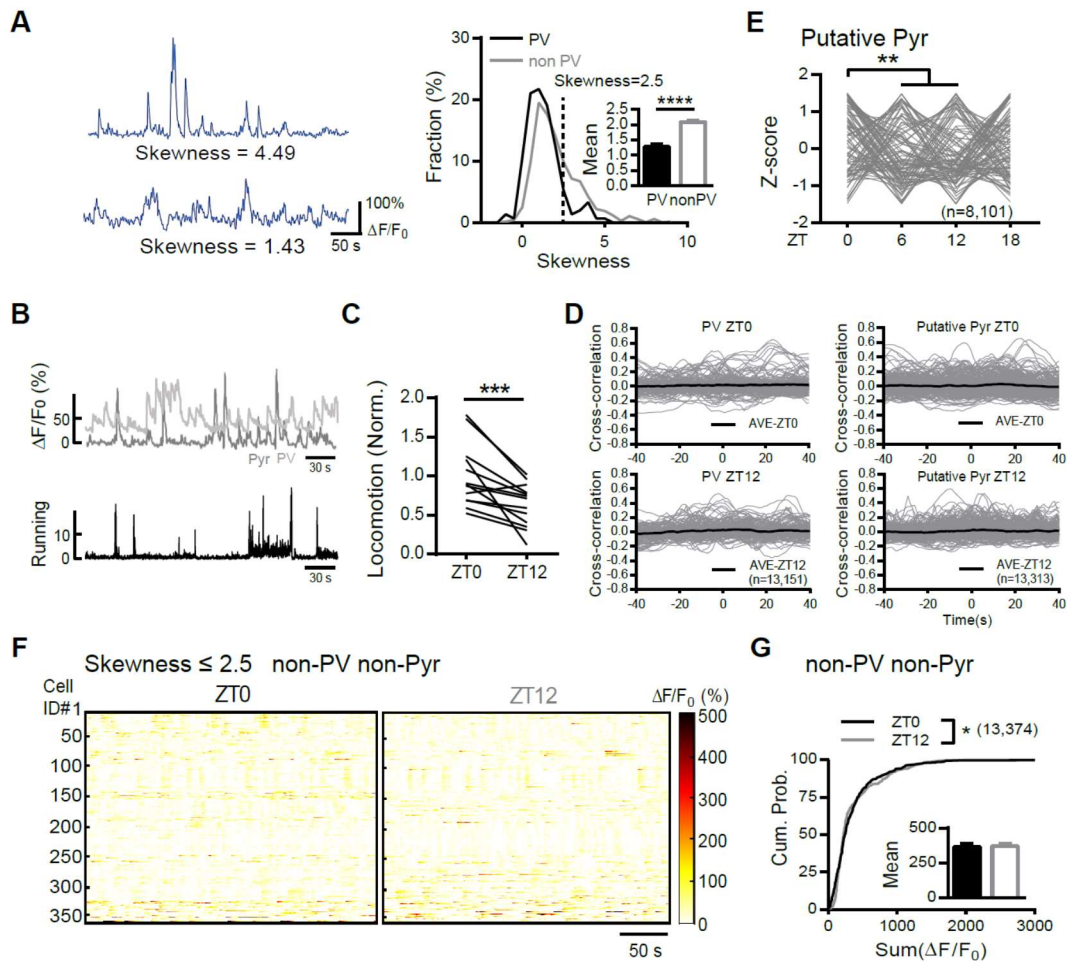

**Appendix Figure S6. PV and putative pyramidal neurons daily oscillations did not correlate with locomotor activity.**

A. Representative  $\Delta F/F_0$  traces and their corresponding skewness from a putative pyramidal neuron (left top) and PV neuron (left bottom). Right panel, Distribution of skewness of PV (black) and non-PV (gray) neurons. Inset: the mean skewness (PV:  $1.26 \pm 0.08$ ; non-PV:  $2.08 \pm 0.05$ ).

B. Top, representative  $\Delta F/F_0$  traces from one PV neuron (light gray) and one putative pyramidal neuron (dark gray) from the same field of view. Bottom, trace showing the instantaneous running speed of the mouse.

C. The normalized locomotor activity of all mice during both imaging sections (ZT0:  $1.0 \pm 0.11$ ; ZT12:  $0.62 \pm 0.07$ ).

D. The cross correlation between the  $\Delta F/F_0$  of individual neuron and the locomotor activity at ZT0 and ZT12 (left panels: PV neurons; right panels: putative pyramidal neurons).

E. Activity of individual putative pyramidal neurons imaged repetitively at four time points (ZT0:  $0.24 \pm 0.09$ ; ZT6:  $-0.14 \pm 0.08$ ; ZT12:  $-0.17 \pm 0.07$ ; ZT18:  $0.07 \pm 0.08$ ; One-way repeated measures ANOVA,  $F(3, 400) = 5.494$ ,  $P = 0.001$ ).

F. Heatmaps showing the spontaneous  $\Delta F/F_0$  time-series of all non-PV, non-pyramidal cells imaged at ZT0 and ZT12.

G. The cumulative distribution of the sum  $\Delta F/F_0$  of all non-PV, non-pyramidal cells imaged at ZT0 (black) and ZT12 (gray) ( $K-S$  test,  $P = 0.027$ ). Inset, the means of sum  $\Delta F/F_0$  (ZT0:  $363.9 \pm 22.27$ ; ZT12:  $370.8 \pm 19.85$   $\mu\text{m}$ ;  $P = 0.75$ ). Sample size indicated as (mice, cells).

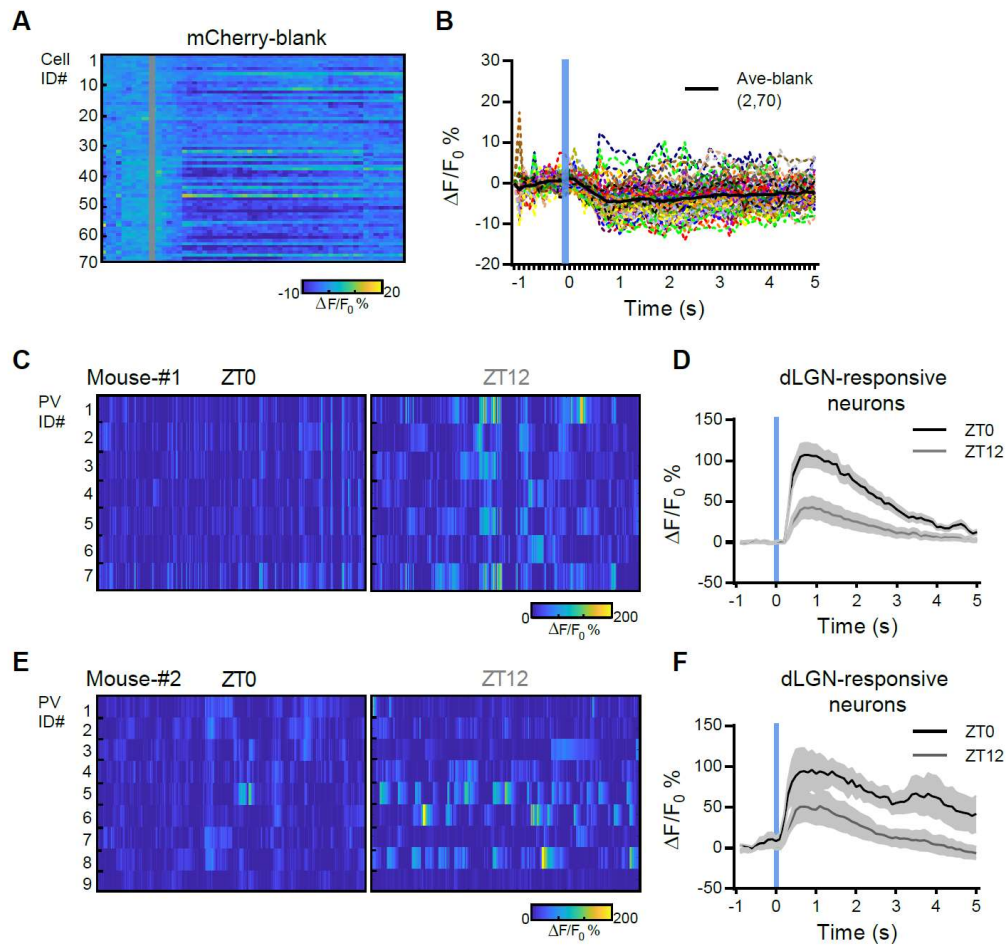

**Appendix Figure S7. Absence of dLGN-evoked response in mice expressing mCherry-blank virus in dLGN.**

A. Heatmap showing  $\text{Ca}^{2+}$  signal upon dLGN light stimulation in mouse expressing mCherry-blank virus in dLGN. Trials were aligned to LED onset time (gray solid lines). B. The mean  $\text{Ca}^{2+}$  response ( $\Delta F/F_0\%$ ) waveforms of all neurons (dotted color lines) within the field of view during all trials of stimulation. The black solid line represents the averaged waveform of all neurons. The vertical blue line indicates stimulus onset time. C-F. Left panels, heatmaps showing the spontaneous activity of PV neurons at ZT0 (left) and ZT12 (right) in mouse #1 (C) and #2(E) during the 5 min prior the onset of the dLGN stimulation. Right panels, mean  $\text{Ca}^{2+}$  response ( $\Delta F/F_0\%$ ) waveforms from all dLGN-responsive neurons in the same FOV of PV neurons at ZT0 (black trace) and ZT12 (gray trace) from mouse #1 (C) and #2(E).

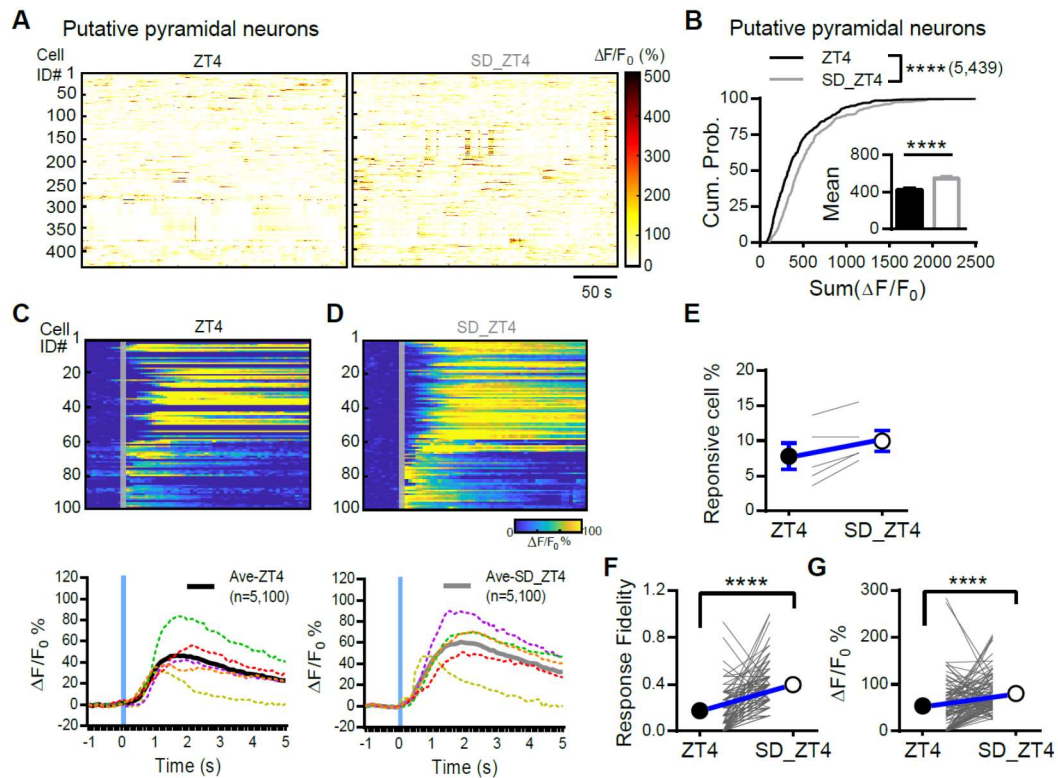

**Appendix Figure S8. 4 hours of sleep deprivation increased spontaneous neural activity of putative pyramidal neurons and augmented dLGN-evoked responses in V1.**

A. Heatmaps showing the spontaneous  $\Delta F/F_0$  time-series traces of all putative pyramidal neurons imaged at ZT4 and SD\_ZT4. The color code represents the magnitude of  $\Delta F/F_0$  (%). B. Cumulative probability distribution of the sum  $\Delta F/F_0$  of all putative pyramidal neurons imaged at ZT4 and SD\_ZT4 (*K-S* test;  $P < 0.0001$ ). Inset: the mean sum  $\Delta F/F_0$  (ZT4:  $427.5 \pm 15.72$ ; SD\_ZT4:  $550.2 \pm 17.87$ ;  $P < 0.0001$ ; Mann-Whitney U test). C-D. Top: color-coded calcium signals of all responsive neurons ( $\Delta F/F_0$  %). Bottom: The mean  $\text{Ca}^{2+}$  response waveform from individual mouse (dotted color lines) and all mice (thick black and gray lines). Trials were aligned to LED onset time (gray solid lines). E. The fraction of neurons responsive to dLGN stimuli at ZT4 and SD\_ZT4. Each gray line represents one mouse. Black and white circles and error bars represent the mean and SEM (ZT4:  $7.8 \pm 1.86$ ; SD\_ZT4:  $9.95 \pm 1.49$ ;  $P = 0.125$ ; Wilcoxon signed-rank test;  $n = 5$  mice). F. The Response fidelity of each cell at ZT4 and SD\_ZT4. Black and white circles and error bars represent the mean and SEM (ZT4:  $0.17 \pm 0.017$ ; SD\_ZT4:  $0.39 \pm 0.018$ ;  $P < 0.0001$ ; Wilcoxon signed-rank test;  $n = 100$  cell). G. Comparison of the evoked response amplitude of each cell at ZT4 and SD\_ZT4. Black and white circles and error bars represent the mean and SEM (ZT4:  $53.97 \pm 5.23$ ; SD\_ZT4:  $80.43 \pm 4.03$ ;  $P < 0.0001$ ; Wilcoxon signed-rank test;  $n = 100$  cell). Sample size is indicated as (mice, cells).
